# Supplementary material for: Accurately fitting biophysical neuron models to experimental voltage data enabled by meta-learning
Source: Research Square preprint supplement (doi:10.21203/rs.3.rs-9694895/v1), 2026-06-02
Supplement: Supplementary file 1 [file 090a76a793747e804cb929ec.docx]

**Supplementary Materials**


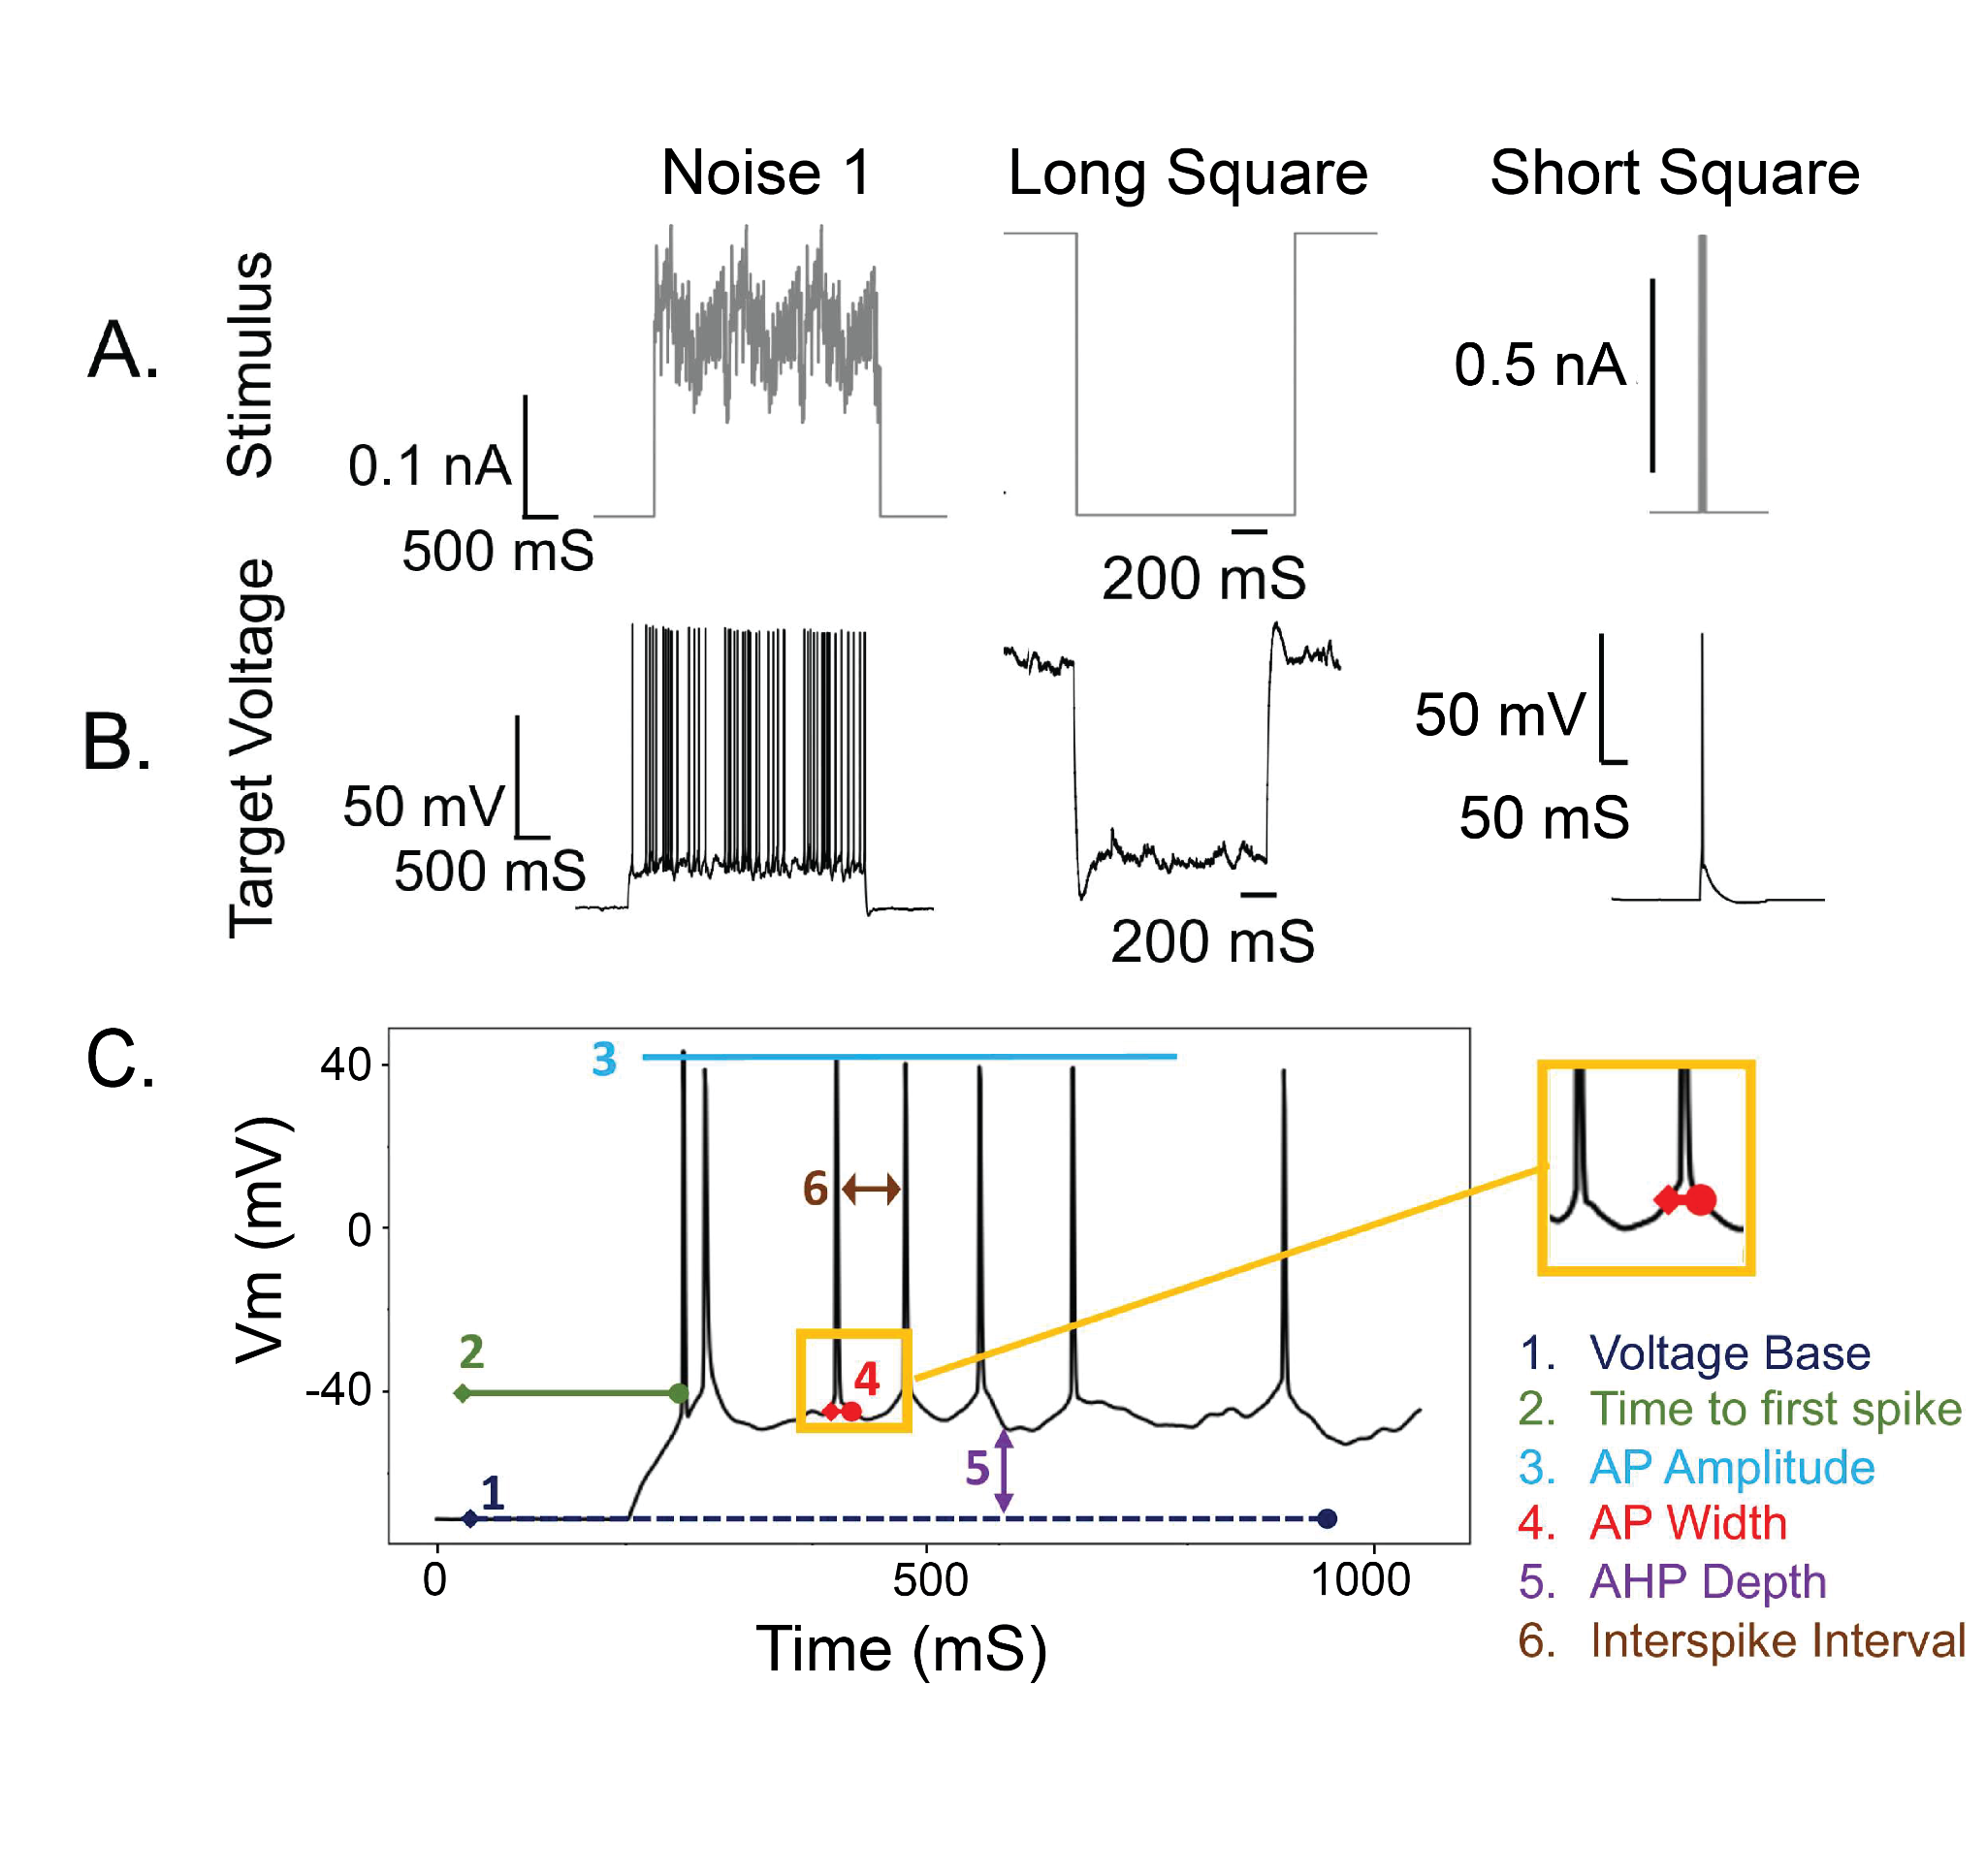


**Figure S1. Stimuli and feature extraction for evolutionary algorithm fitting**. (adapted from [Ladd et al., 2022)](https://www.zotero.org/google-docs/?zzWc1a) A: Example stimuli protocols, noise was not used in CoMParE objectives but long square sub/subpra threshold (subthreshold shown) and short square were. B: Corresponding target voltage responses recorded from patch clamp experiments resulting from the stimuli in (A). These experimental traces represent the ground truth membrane potential dynamics that the evolutionary algorithm aims to reproduce through parameter optimization. C: Demonstration of how electrophysiological score functions are computed on a single voltage trace. eFEL+ features, including spike timing, action potential characteristics, and afterhyperpolarization properties, are extracted from both target and simulated traces. These error functions quantify the difference between experimental and model responses, forming the elementary errors that are weighted and combined in the CoMParE objective function.

**Figure S2. Multiple stimuli probe different dimensions of the electrophysiological feature space for the BBP model.**
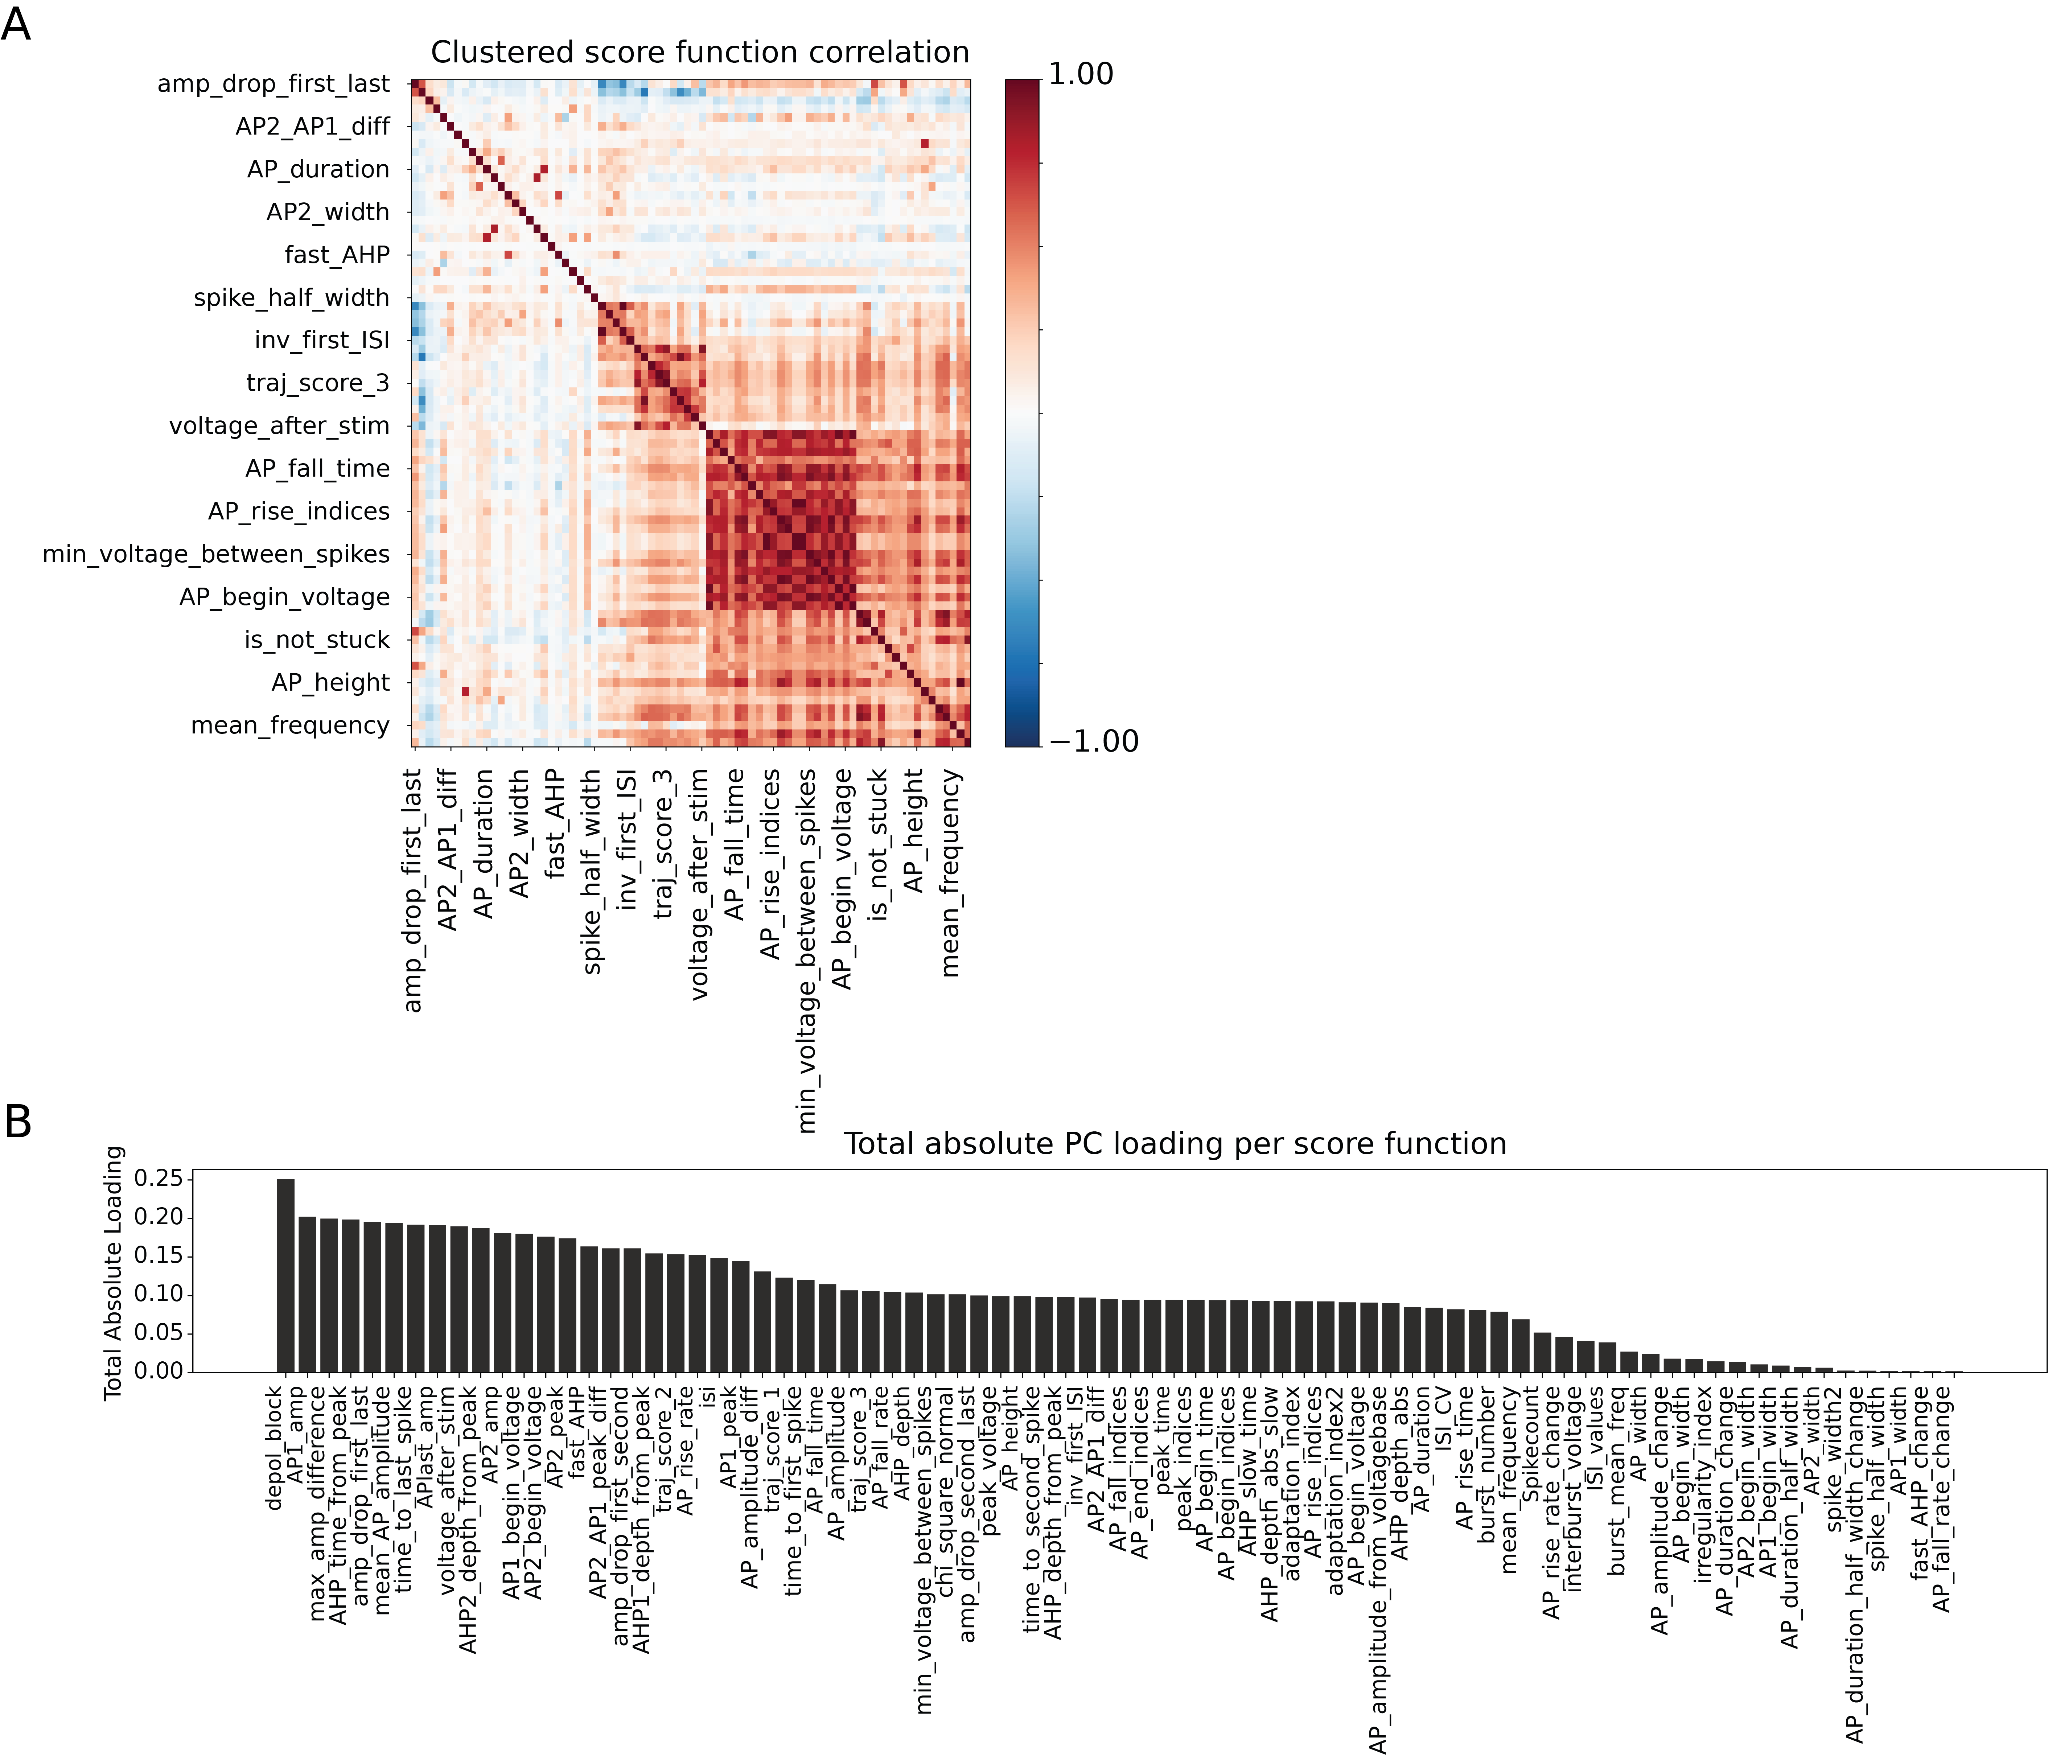


A: Covariance matrix of eFEL+ error functions computed across 5000 parameter samples for 4 stimuli. Features reordered by hierarchical clustering, revealing block structure of correlated feature groups. B: Total absolute PCA loading weight for each eFEL+ feature (summed across principal components), sorted by magnitude. Features with higher loading weights contribute more to the overall variance in the objective function space.

**
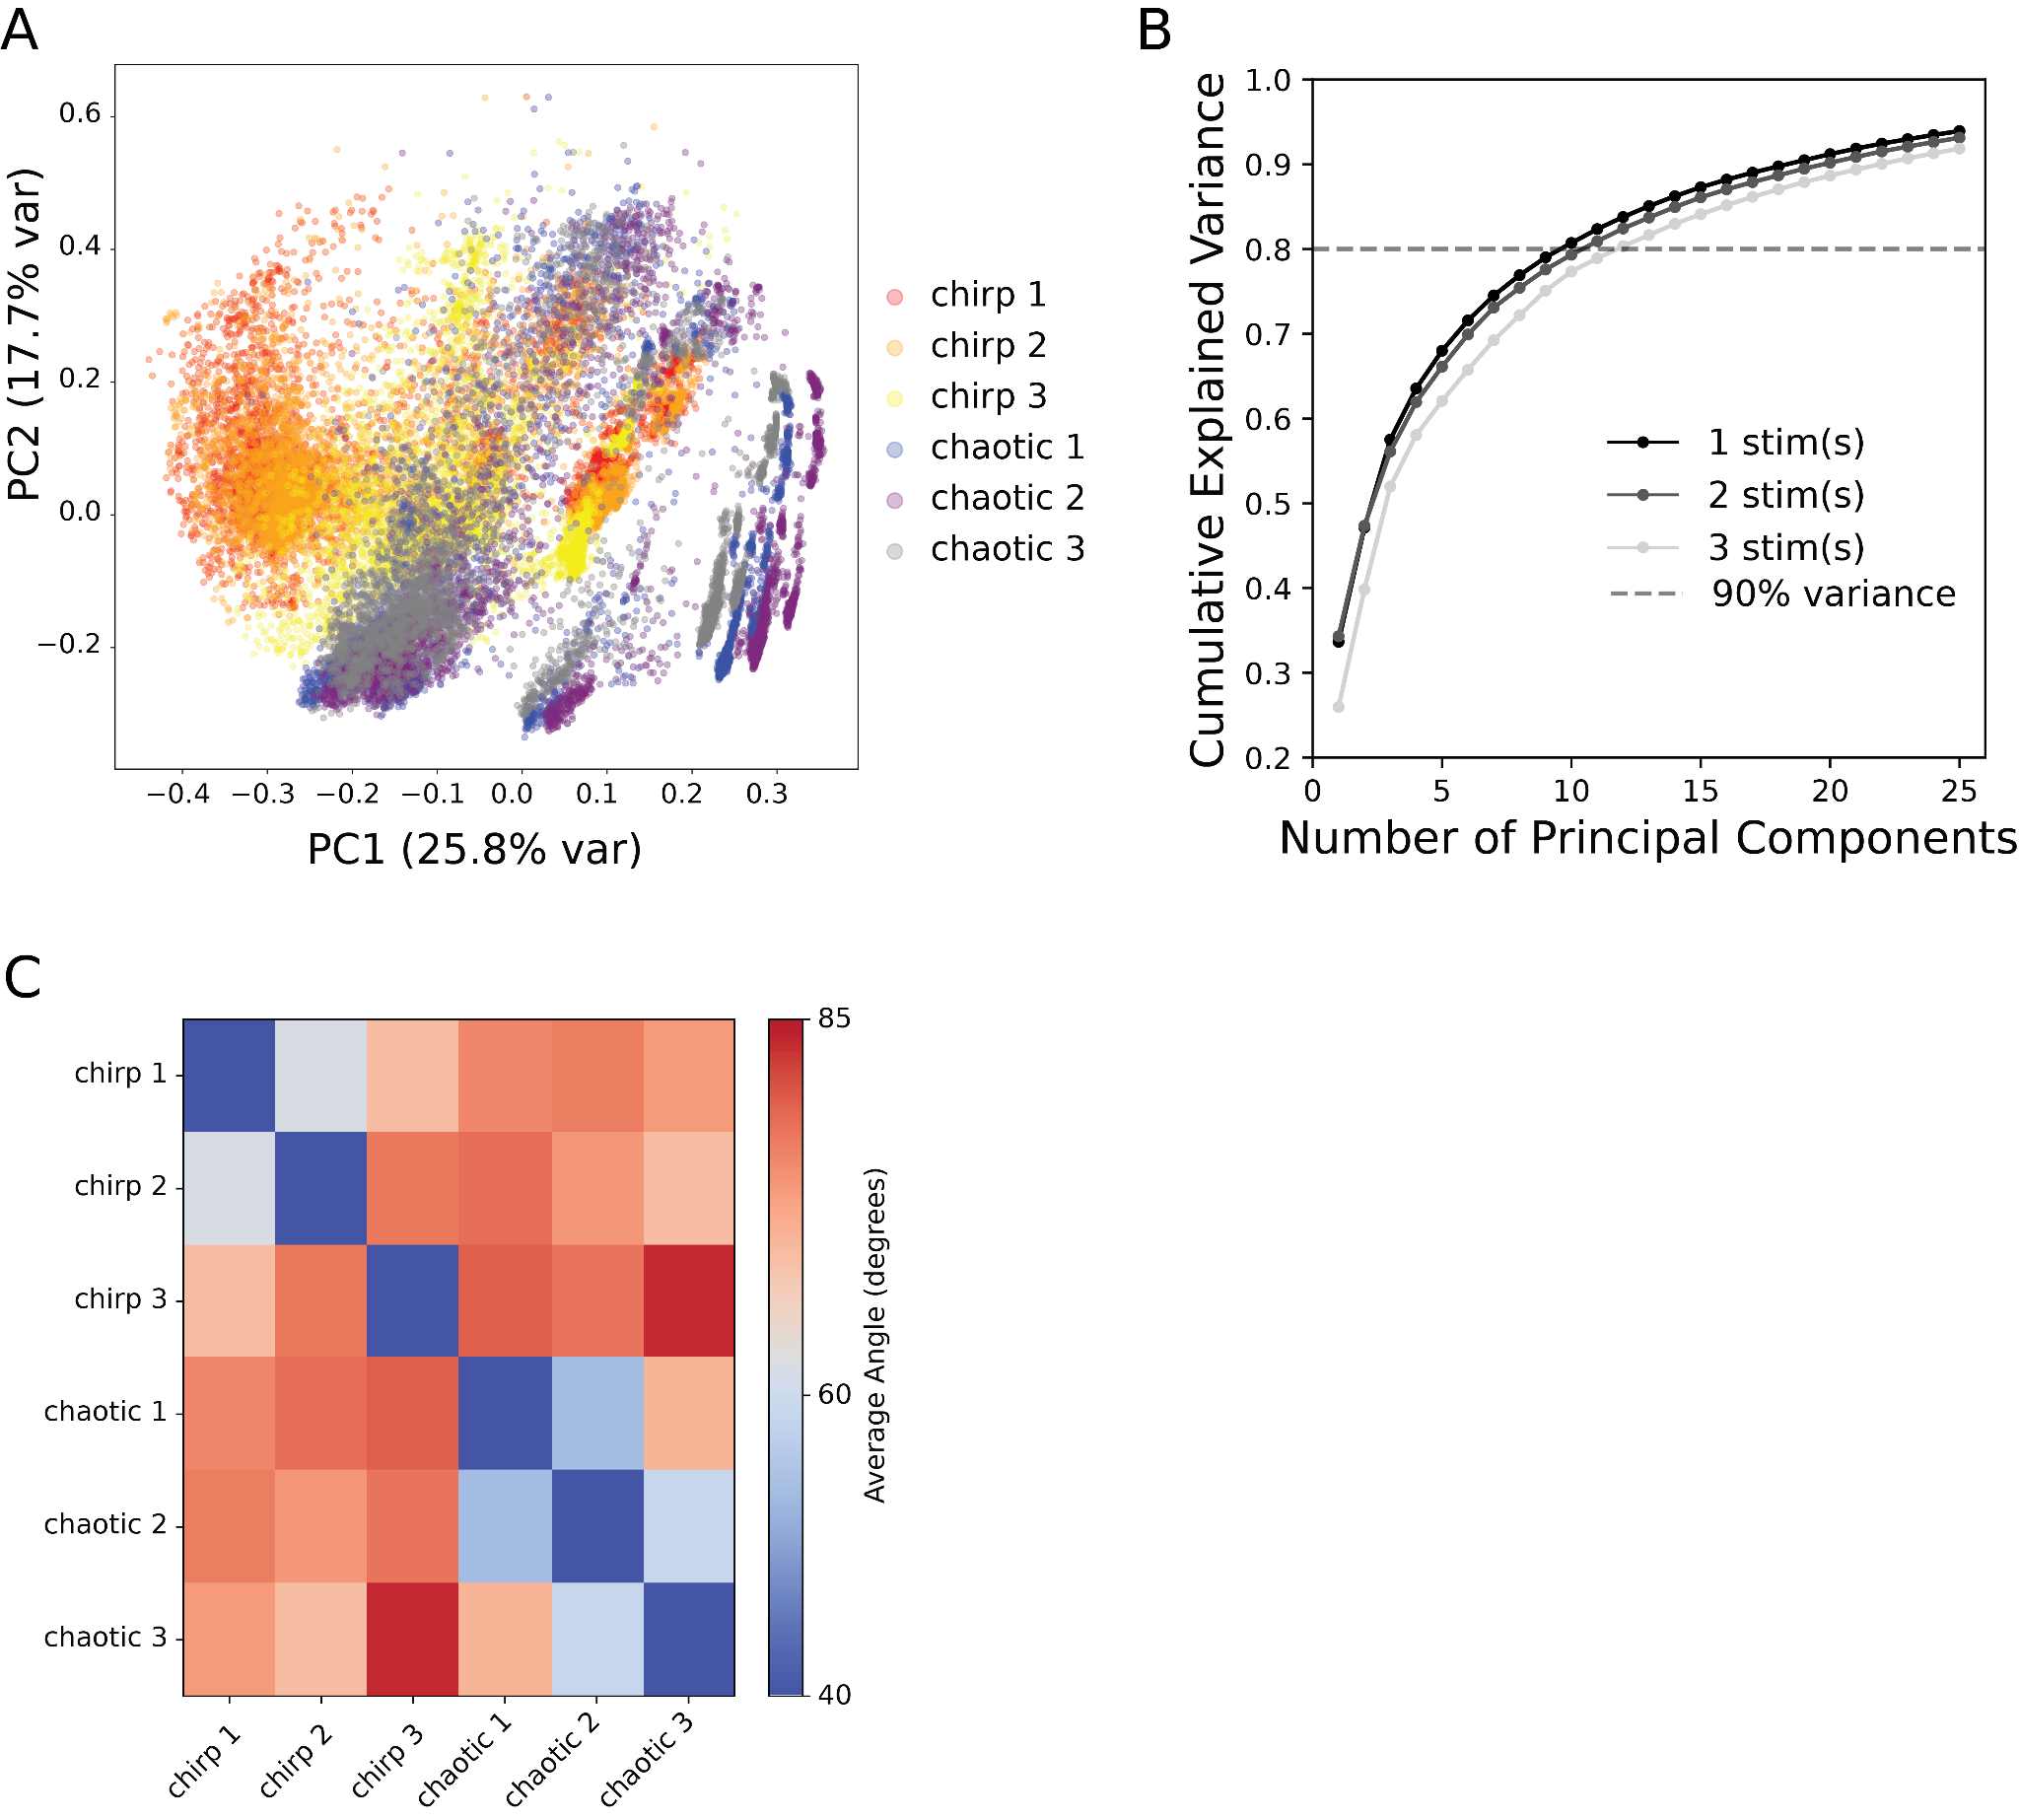
**

**Figure S3. Principal component analysis shows additional stimuli increase the span of objective function space.**

A: PCA projection of score functions onto the first two principal components for 6 stimuli (5000 parameter samples each). Each stimulus occupies a distinct region in PC space, with PC1 and PC2 explaining 26% and 18% of total variance, respectively. B: Cumulative explained variance as a function of principal component number for 1-5 stimuli. Increasing stimulus number requires more components to capture 80% of variance (dashed line), indicating that multiple stimuli explore complementary dimensions of the feature space. C: Angular similarity matrix showing average angle (in degrees) between stimuli in 10-dimensional PC space. For each stimulus pair, the angle θ between their representations is calculated as θ = arccos(v₁·v₂ / |v₁||v₂|), where v₁ and v₂ are the unit vectors of the PCA-transformed score function distributions in each principal component dimension. The displayed values represent the mean angle averaged across all 10 PC dimensions. Blue regions (≈40°) indicate high similarity with small angular separation between stimulus responses, suggesting similar electrophysiological profiles. Red regions (≈85°) indicate low similarity with near-orthogonal separation, suggesting distinct response patterns. Block structure reveals clusters of functionally related chirp and stimulus patterns.


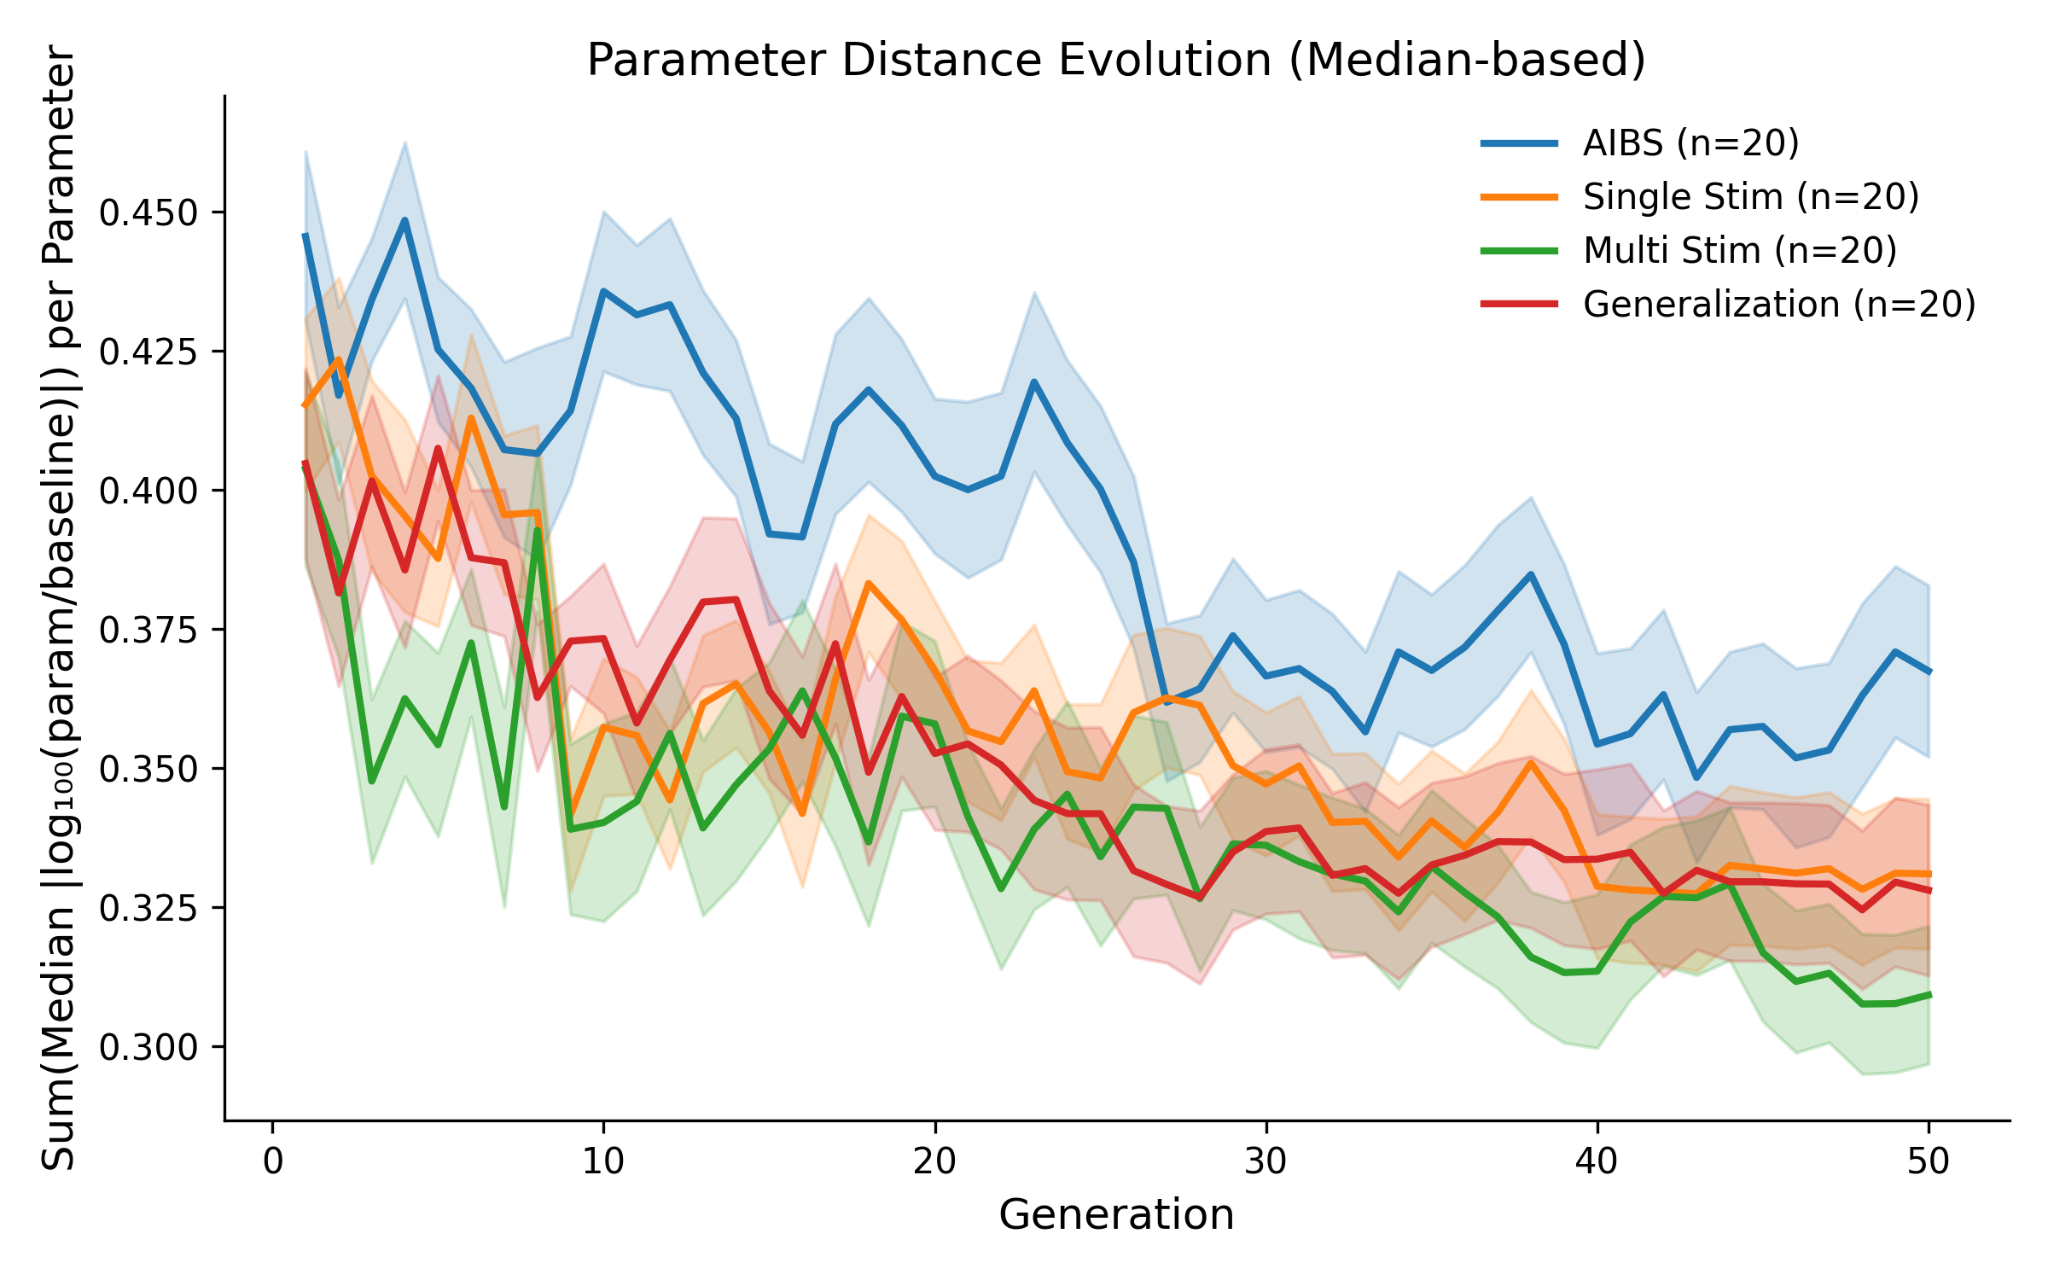


**Figure S4. Distance from known target model parameters across EA (associated with Figure 3).**

Each method uses an evolutionary algorithm (EA) to optimize a set of model parameters to produce electrophysiological waveforms identical to those of a BBP model with known ground-truth parameters. We measure distance from the best model to the ground truth using log100(best_param/ground_truth) to calculate a distance for each parameter and seed pair. We take the median log distance over 20 seeds and then sum over 19 parameters to compute the distance metric on the y-axis. We plot SEM over the total error for each seed as shaded boundaries. All methods converge by generation 50. Lower distance is better. CoMParE multi-stim converges faster and to a lower overall median error. All CoMParE methods outperform the score function (employed by [Gouwens et al., 2018)](https://www.zotero.org/google-docs/?QvEMMg).

**
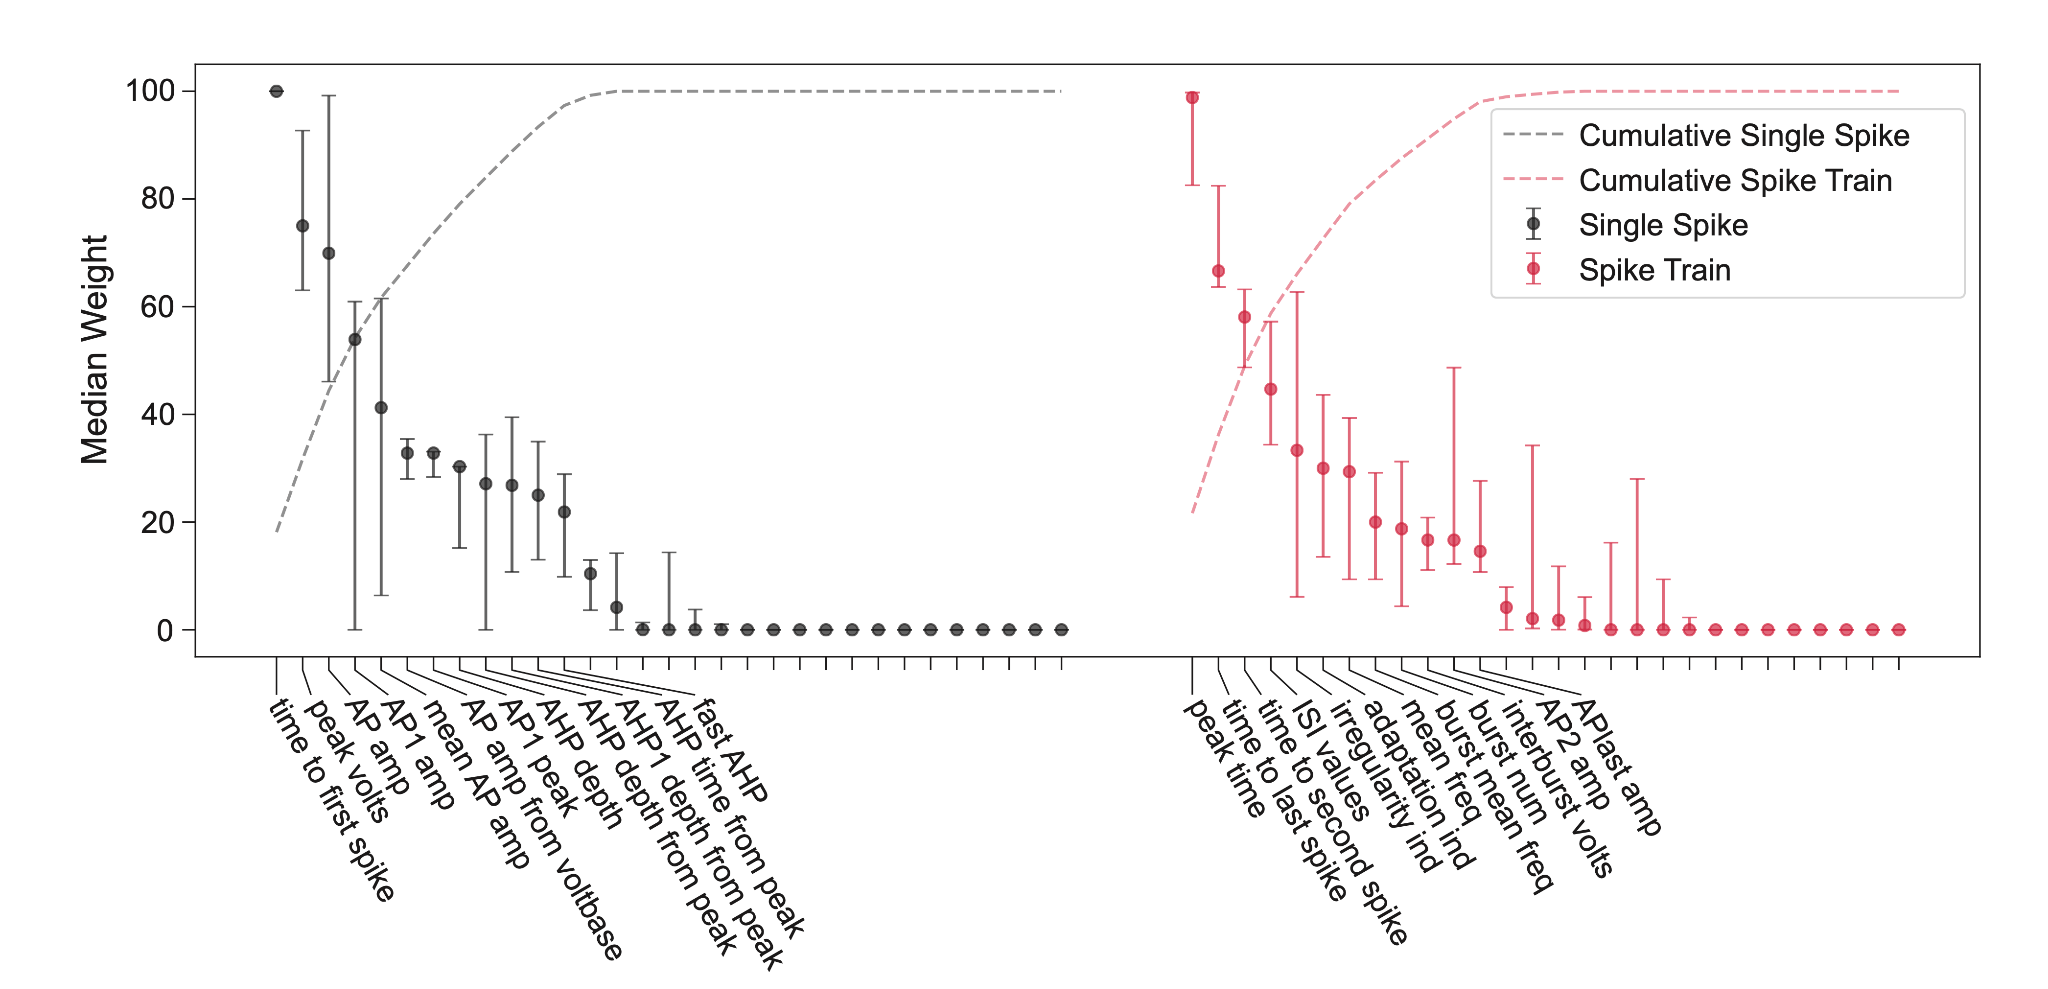
**

**Figure S5. Weighting of individual eFEL+ features in meta-learned objective function.**

Shows among which features did the CoMParE meta-learning algorithm selected as important features across all stimuli and cells. This weighting (median and interquartile range) provides interpretability which can bring electrophysiological insights relevant for accurate fitting of cells. For example, CoMParE heavily weighted spike timing features like time to first spike and peak time, both with weights of 100, which are likely sensitive to the interplay between sodium channel activation and potassium channel-mediated repolarization. This feature selection pattern suggests that CoMParE may have learned to prioritize different temporal aspects of the voltage waveform, which together provide complementary perspectives on the underlying ionic conductances. Out of widely available eFEL+ features, small subsets are chosen repeatedly across diverse stimuli and cells, yet their weight distribution varies. This behavior suggests that although a core subset of features is generally most informative for discriminating membrane potential responses, their weights must be carefully tuned to achieve the best fit for individual cells. CoMParE’s relative improvement in inferred parameter-set rank and the resulting optimized electrophysiological responses demonstrate how optimizing a linear combination of error function weights can create an empirically useful objective function.

**
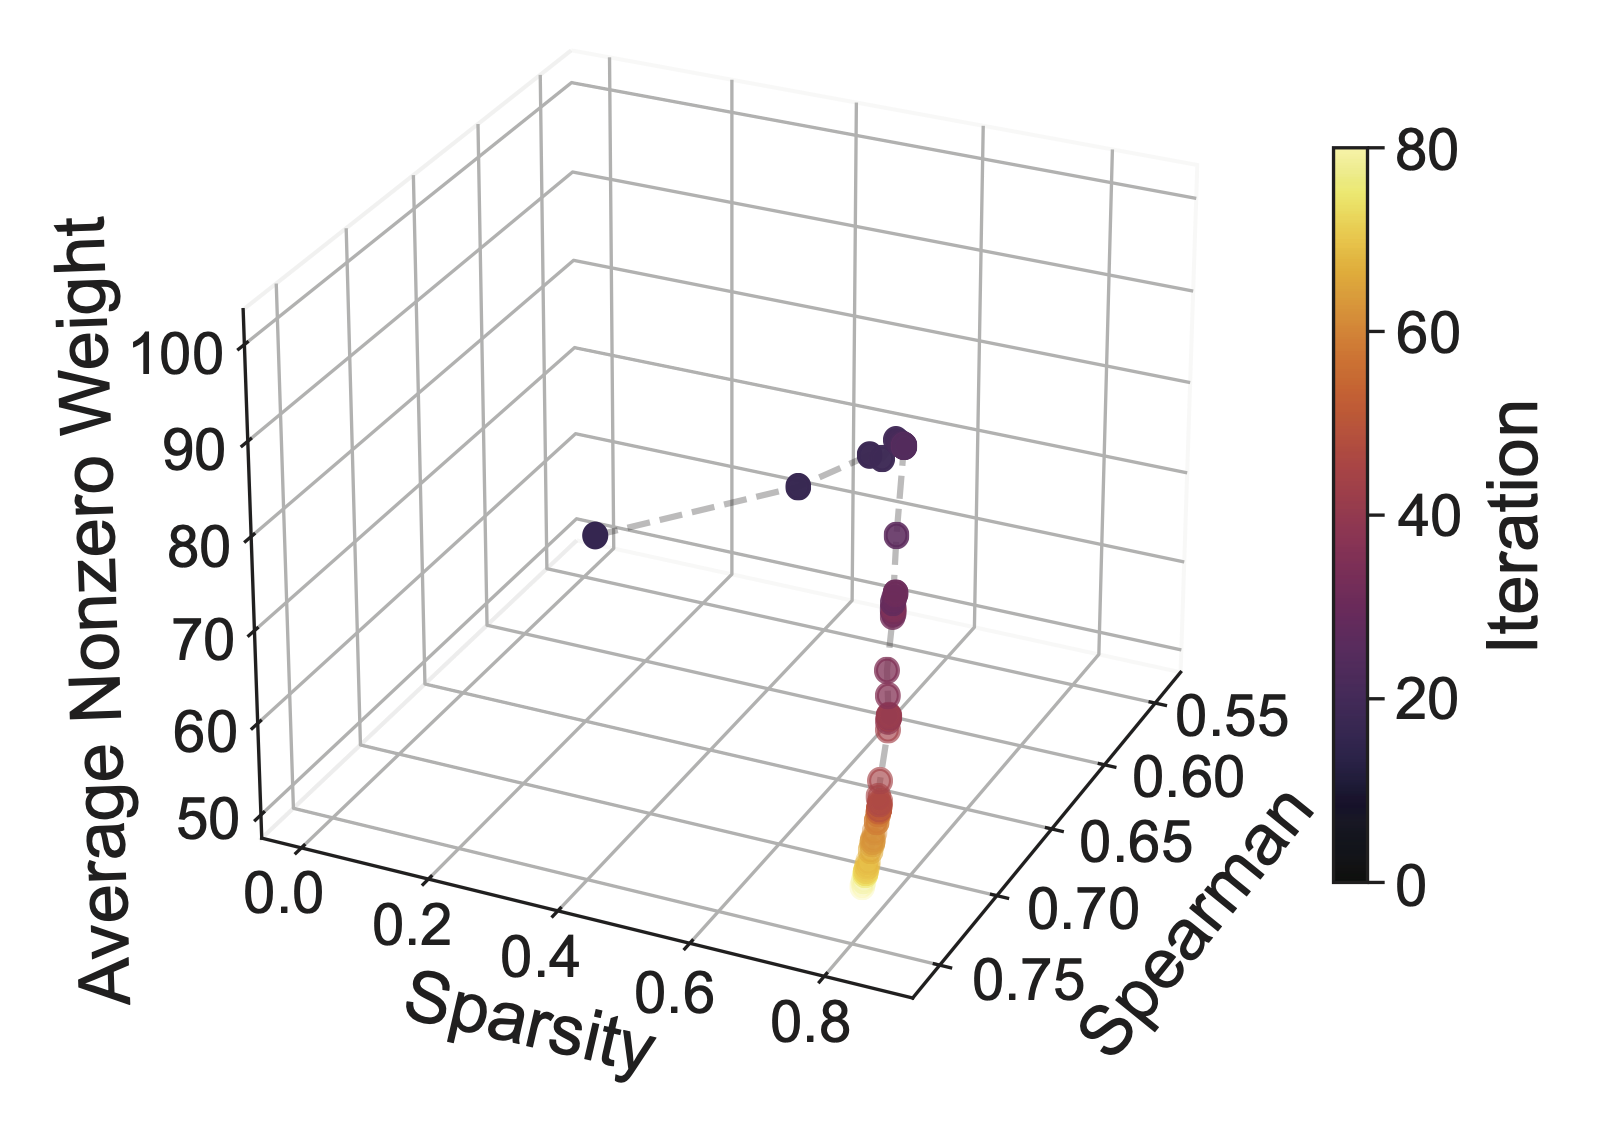
**

**Figure S6** **meta-learning trajectory from CoMParE with the BBP model**.

Early iterations (dark colors) show low Spearman correlation (ρ < 0.5), but as optimization progresses (lighter colors), correlation increases, reaching final values of ρ ≈ 0.8. In addition, the weight sparsity and the average of nonzero weights show similar behavior, sharply increasing to maximum values in the early iterations but slowly converging in the later iterations. These behaviors suggest that the algorithm first explores broadly, then focuses on the most important features.

**
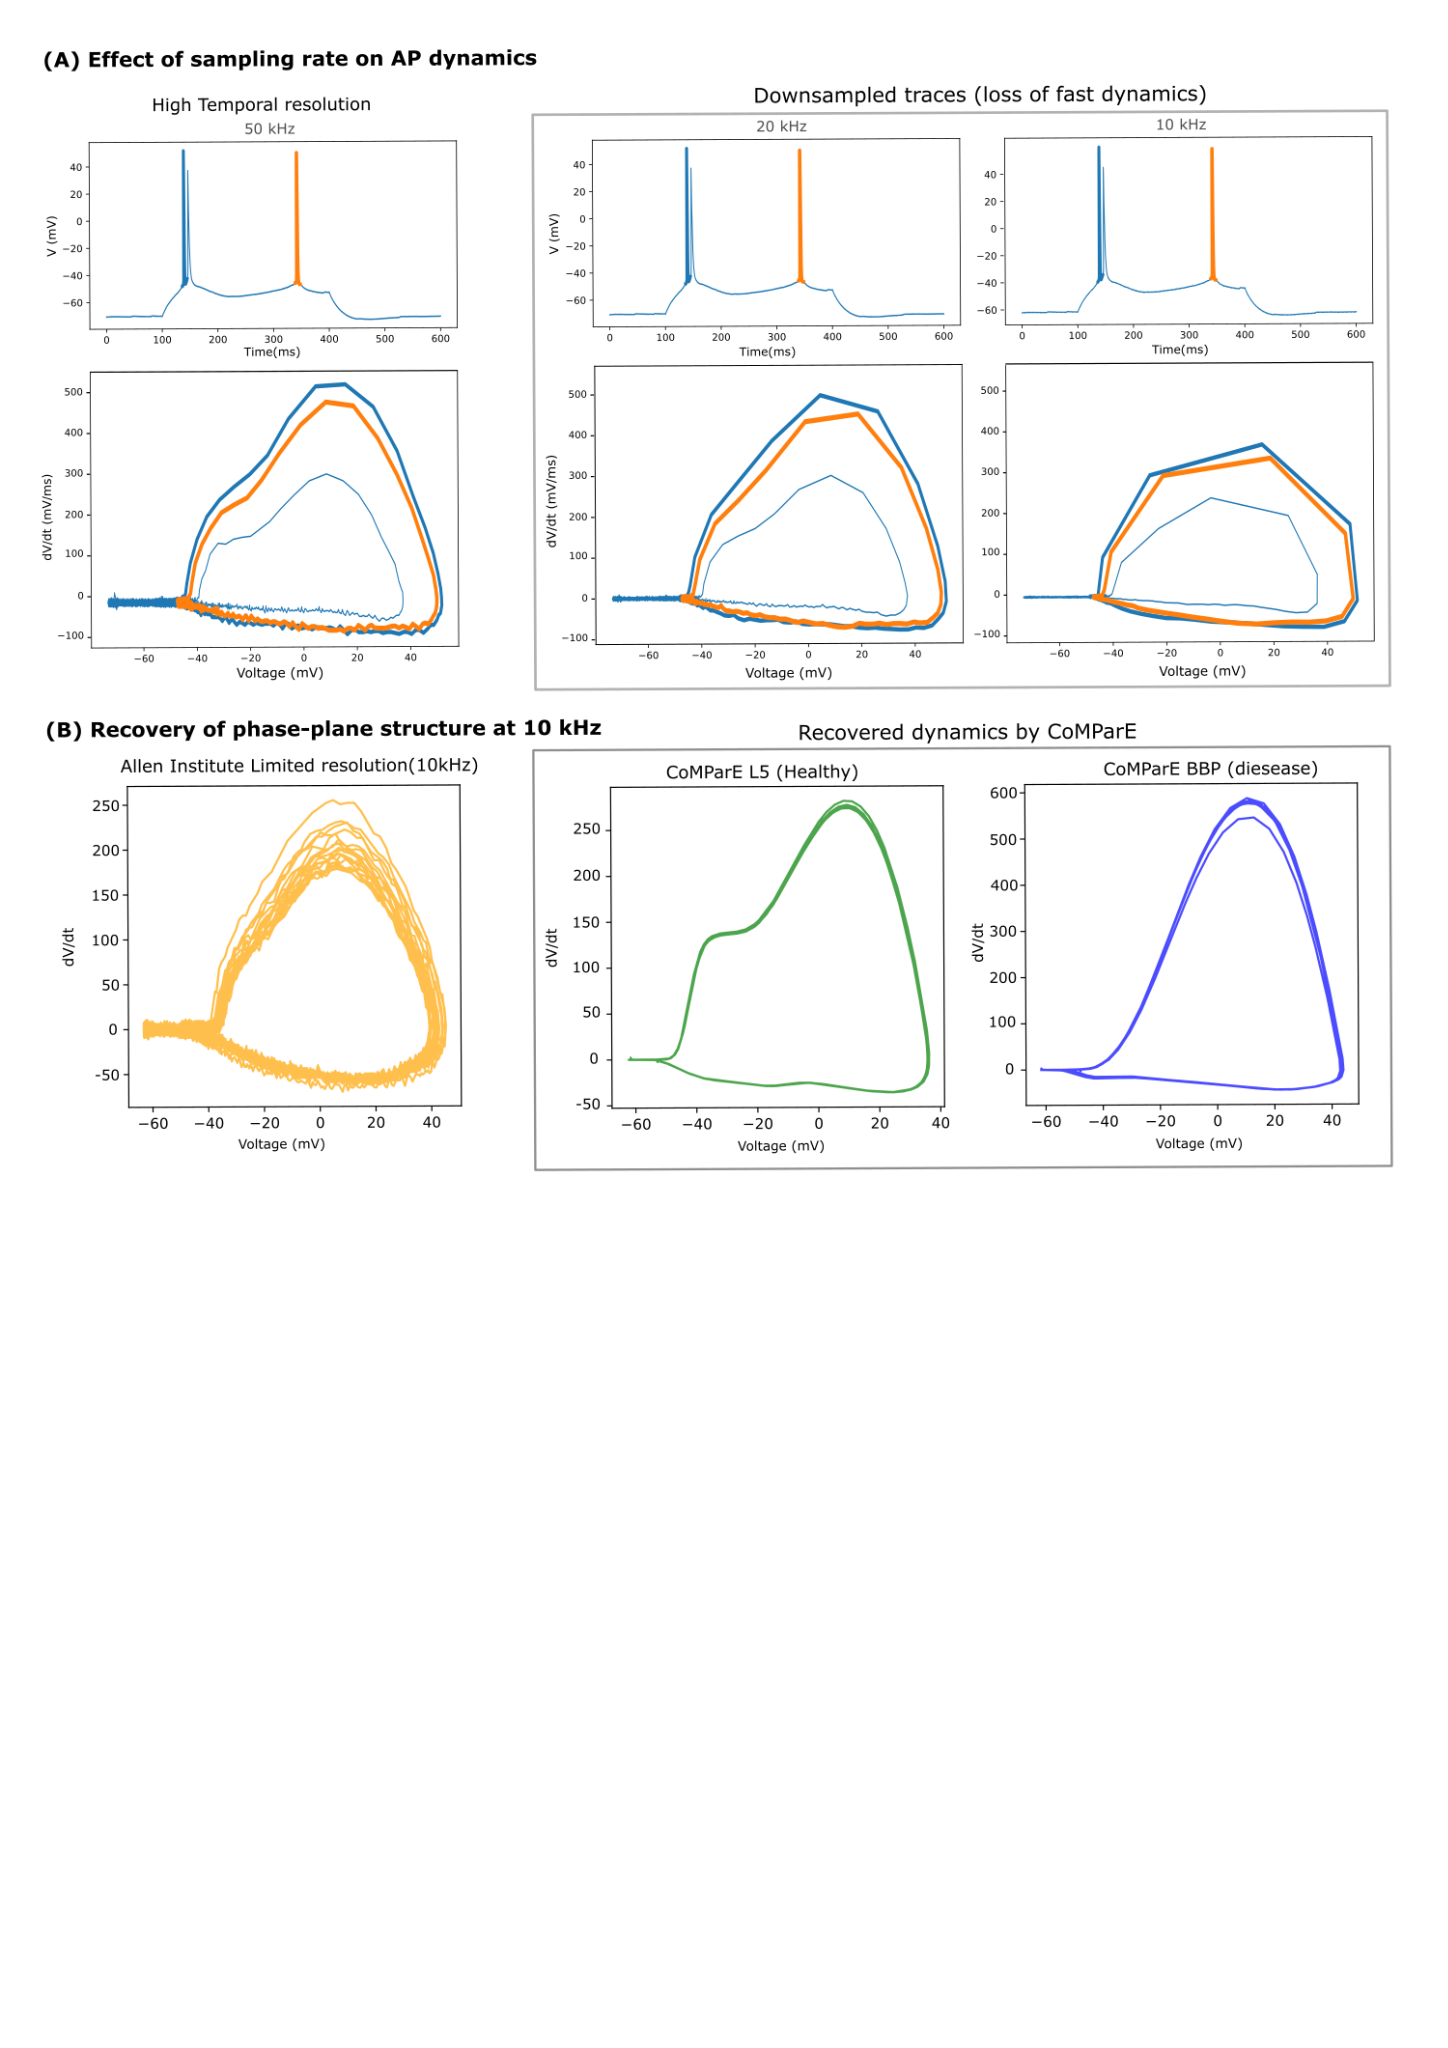
**

**Figure S7: Effect of sampling rate on action potential dynamics and recovery of phase-plane structure using CoMParE.**

(A): Voltage traces (top) and corresponding phase-plane representations (dV/dt vs. V; bottom) of the same action potential recorded at high temporal resolution (50 kHz) and after downsampling to 20 kHz and 10 kHz (adapted from [Spratt et al., 2019)](https://www.zotero.org/google-docs/?Wwcqnr). Reduced sampling progressively distorts spike upstroke dynamics, resulting in attenuation of peak dV/dt and deformation of phase-plane geometry. (B): Recovery of phase-plane structure at 10 kHz. Ground-truth experimental recordings from the Allen Institute are compared with dynamics recovered by CoMParE for a healthy L5 neuron and a disease-model BBP neuron. Despite limited temporal resolution, CoMParE recovers distinct and biologically interpretable action potential dynamics

| **Feature name** | **Single spike characterization** | **Spike train statistics** | **Passive** | **General** | **Feature type** |
| --- | --- | --- | --- | --- | --- |
| peak_time |  | true |  |  | eFEL |
| time_to_first_spike | true | true |  |  | eFEL |
| time_to_last_spike |  | true |  |  | eFEL |
| time_to_second_spike |  | true |  |  | eFEL |
| inv_time_to_first_spike | true | true |  |  | eFEL |
| ISI_values |  | true |  |  | eFEL |
| all_ISI_values |  | true |  |  | eFEL |
| inv_ISI_values |  | true |  |  | eFEL |
| inv_first_ISI | true | true |  |  | eFEL |
| inv_second_ISI |  | true |  |  | eFEL |
| inv_third_ISI |  | true |  |  | eFEL |
| inv_fourth_ISI |  | true |  |  | eFEL |
| inv_fifth_ISI |  | true |  |  | eFEL |
| inv_last_ISI |  | true |  |  | eFEL |
| doublet_ISI |  | true |  |  | eFEL |
| ISI_semilog_slope |  | true |  |  | eFEL |
| ISI_log_slope |  | true |  |  | eFEL |
| ISI_log_slope_skip |  | true |  |  | eFEL |
| ISI_CV |  | true |  |  | eFEL |
| irregularity_index |  | true |  |  | eFEL |
| adaptation_index |  | true |  |  | eFEL |
| adaptation_index2 |  | true |  |  | eFEL |
| Spikecount |  | true |  |  | eFEL |
| Spikecount_stimint |  | true |  |  | eFEL |
| number_initial_spikes |  | true |  |  | eFEL |
| mean_frequency |  | true |  |  | eFEL |
| strict_burst_mean_freq |  | true |  |  | eFEL |
| burst_mean_freq |  | true |  |  | eFEL |
| strict_burst_number |  | true |  |  | eFEL |
| burst_number |  | true |  |  | eFEL |
| single_burst_ratio |  | true |  |  | eFEL |
| spikes_per_burst |  | true |  |  | eFEL |
| spikes_per_burst_diff |  | true |  |  | eFEL |
| spikes_in_burst1_burst2_diff |  | true |  |  | eFEL |
| spikes_in_burst1_burstlast_diff |  | true |  |  | eFEL |
| strict_interburst_voltage |  | true |  |  | eFEL |
| interburst_voltage |  | true |  |  | eFEL |
| interburst_min_values |  | true |  |  | eFEL |
| interburst_duration |  | true |  |  | eFEL |
| interburst_15percent_values |  | true |  |  | eFEL |
| interburst_20percent_values |  | true |  |  | eFEL |
| interburst_25percent_values |  | true |  |  | eFEL |
| interburst_30percent_values |  | true |  |  | eFEL |
| interburst_40percent_values |  | true |  |  | eFEL |
| interburst_60percent_values |  | true |  |  | eFEL |
| time_to_interburst_min |  | true |  |  | eFEL |
| time_to_postburst_slow_ahp |  | true |  |  | eFEL |
| postburst_min_values |  | true |  |  | eFEL |
| postburst_slow_ahp_values |  | true |  |  | eFEL |
| postburst_fast_ahp_values |  | true |  |  | eFEL |
| postburst_adp_peak_values |  | true |  |  | eFEL |
| time_to_postburst_fast_ahp |  | true |  |  | eFEL |
| time_to_postburst_adp_peak |  | true |  |  | eFEL |
| peak_voltage | true | true |  |  | eFEL |
| AP_amplitude | true | true |  |  | eFEL |
| AP1_amp | true | true |  |  | eFEL |
| AP2_amp |  | true |  |  | eFEL |
| APlast_amp |  | true |  |  | eFEL |
| mean_AP_amplitude | true | true |  |  | eFEL |
| AP_amplitude_change |  | true |  |  | eFEL |
| AP_amplitude_from_voltagebase | true | true |  |  | eFEL |
| AP1_peak | true | true |  |  | eFEL |
| AP2_peak |  | true |  |  | eFEL |
| AP2_AP1_diff |  | true |  |  | eFEL |
| AP2_AP1_peak_diff |  | true |  |  | eFEL |
| amp_drop_first_second |  | true |  |  | eFEL |
| amp_drop_first_last |  | true |  |  | eFEL |
| amp_drop_second_last |  | true |  |  | eFEL |
| max_amp_difference |  | true |  |  | eFEL |
| AP_amplitude_diff |  | true |  |  | eFEL |
| min_AHP_values |  | true |  |  | eFEL |
| AHP_depth | true | true |  |  | eFEL |
| AHP_depth_diff | true | true |  |  | eFEL |
| AHP_depth_from_peak | true | true |  |  | eFEL |
| AHP1_depth_from_peak | true | true |  |  | eFEL |
| AHP2_depth_from_peak |  | true |  |  | eFEL |
| AHP_time_from_peak | true | true |  |  | eFEL |
| fast_AHP | true | true |  |  | eFEL |
| fast_AHP_change | true | true |  |  | eFEL |
| AHP_depth_abs_slow | true | true |  |  | eFEL |
| AHP_depth_slow | true | true |  |  | eFEL |
| AHP_slow_time | true | true |  |  | eFEL |
| ADP_peak_values | true | true |  |  | eFEL |
| ADP_peak_amplitude | true | true |  |  | eFEL |
| depolarized_base | true | true |  |  | eFEL |
| min_voltage_between_spikes |  | true |  |  | eFEL |
| min_between_peaks_values |  | true |  |  | eFEL |
| AP_duration_half_width | true | true |  |  | eFEL |
| AP_duration_half_width_change | true | true |  |  | eFEL |
| AP_width | true | true |  |  | eFEL |
| AP_duration | true | true |  |  | eFEL |
| AP_duration_change | true | true |  |  | eFEL |
| AP_width_between_threshold | true | true |  |  | eFEL |
| spike_half_width | true | true |  |  | eFEL |
| AP1_width | true | true |  |  | eFEL |
| AP2_width |  | true |  |  | eFEL |
| APlast_width |  | true |  |  | eFEL |
| spike_width2 |  | true |  |  | eFEL |
| AP_begin_width | true | true |  |  | eFEL |
| AP1_begin_width |  | true |  |  | eFEL |
| AP2_begin_width |  | true |  |  | eFEL |
| AP2_AP1_begin_width_diff |  | true |  |  | eFEL |
| AP_begin_voltage | true | true |  |  | eFEL |
| AP1_begin_voltage |  | true |  |  | eFEL |
| AP2_begin_voltage |  | true |  |  | eFEL |
| AP_begin_time | true | true |  |  | eFEL |
| AP_peak_upstroke | true | true |  |  | eFEL |
| AP_peak_downstroke | true | true |  |  | eFEL |
| AP_rise_time | true | true |  |  | eFEL |
| AP_fall_time | true | true |  |  | eFEL |
| AP_rise_rate | true | true |  |  | eFEL |
| AP_fall_rate | true | true |  |  | eFEL |
| AP_rise_rate_change | true | true |  |  | eFEL |
| AP_fall_rate_change | true | true |  |  | eFEL |
| AP_phaseslope | true | true |  |  | eFEL |
| phaseslope_max | true | true |  |  | eFEL |
| initburst_sahp |  | true |  |  | eFEL |
| initburst_sahp_ssse |  | true |  |  | eFEL |
| initburst_sahp_vb |  |  |  |  | eFEL |
| steady_state_voltage_stimend |  |  |  | true | eFEL |
| steady_state_hyper |  |  | true |  | eFEL |
| steady_state_voltage |  |  |  | true | eFEL |
| voltage_base |  |  |  | true | eFEL |
| current_base |  |  |  | true | eFEL |
| time_constant |  |  | true |  | eFEL |
| decay_time_constant_after_stim |  |  |  | true | eFEL |
| multiple_decay_time_constant_after_stim |  |  |  | true | eFEL |
| sag_time_constant |  |  | true |  | eFEL |
| sag_amplitude |  |  | true |  | eFEL |
| sag_ratio1 |  |  | true |  | eFEL |
| sag_ratio2 |  |  | true |  | eFEL |
| ohmic_input_resistance |  |  |  | true | eFEL |
| ohmic_input_resistance_vb_ssse |  |  |  | true | eFEL |
| voltage_deflection_vb_ssse |  |  |  | true | eFEL |
| voltage_deflection |  |  |  | true | eFEL |
| voltage_deflection_begin |  |  |  | true | eFEL |
| voltage_after_stim |  |  |  | true | eFEL |
| minimum_voltage |  |  |  | true | eFEL |
| maximum_voltage |  |  |  | true | eFEL |
| maximum_voltage_from_voltagebase |  |  |  | true | eFEL |
| depol_block_bool |  |  |  | true | eFEL |
| impedance |  |  |  | true | eFEL |
| ADP_peak_indices |  |  |  |  | eFEL |
| AHP_depth_abs |  |  |  |  | eFEL |
| AP_begin_indices |  |  |  |  | eFEL |
| AP_end_indices |  |  |  |  | eFEL |
| AP_fall_indices |  |  |  |  | eFEL |
| AP_height |  |  |  |  | eFEL |
| AP_rise_indices |  |  |  |  | eFEL |
| burst_begin_indices |  |  |  |  | eFEL |
| burst_end_indices |  |  |  |  | eFEL |
| interburst_15percent_indices |  |  |  |  | eFEL |
| interburst_20percent_indices |  |  |  |  | eFEL |
| interburst_25percent_indices |  |  |  |  | eFEL |
| interburst_30percent_indices |  |  |  |  | eFEL |
| interburst_40percent_indices |  |  |  |  | eFEL |
| interburst_60percent_indices |  |  |  |  | eFEL |
| interburst_min_indices |  |  |  |  | eFEL |
| is_not_stuck |  |  |  |  | eFEL |
| min_AHP_indices |  |  |  |  | eFEL |
| min_between_peaks_indices |  |  |  |  | eFEL |
| peak_indices |  |  |  |  | eFEL |
| postburst_adp_peak_indices |  |  |  |  | eFEL |
| postburst_fast_ahp_indices |  |  |  |  | eFEL |
| postburst_min_indices |  |  |  |  | eFEL |
| postburst_slow_ahp_indices |  |  |  |  | eFEL |
| steady_state_current_stimend |  |  |  |  | eFEL |
| ISIs |  |  |  |  | eFEL |
| burst_ISI_indices |  |  |  |  | eFEL |
| depol_block |  |  |  |  | eFEL |
| trace_check |  |  |  |  | eFEL |
| activation_time_constant |  |  |  |  | eFEL |
| deactivation_time_constant |  |  |  |  | eFEL |
| inactivation_time_constant |  |  |  |  | eFEL |
| chi_square_normal |  |  |  |  | custom |
| traj_score |  |  |  |  | custom |
| rev_dot_product |  |  |  |  | custom |
| KL_divergence |  |  |  |  | custom |
| DTWDistance |  |  |  |  | custom |

**Table S1. List of all considered eFEL and custom features and the categorization.**The 4 categories of single spike characterization, spike train statistics, passive and general are chosen to best represent the features in described categories indicated with *true* marker, but not in a mutually exclusive manner. For a stimulus that produced less than 4 action potentials, only single spike characterization features were computed. If 4 or more action potentials are produced, single spike characterization, spike train statistics features were computed. For a stimulus that did not produce any action potentials, passive and general features were computed for analysis. The detailed implementation of the custom features are presented in our GitHub repository.

| Param_name | Base_value | Lower_bound | Upper_bound | Fixed |
| --- | --- | --- | --- | --- |
| gnabar_hh | 1.20E-01 | 1.20E-03 | 1.01E+01 | No |
| gkbar_hh | 3.60E-02 | 3.60E-04 | 3.60E+00 | No |
| gl_hh | 3.00E-04 | 3.00E-06 | 3.00E-02 | No |

**Table S2. HH model parameters and bounds.**Parameters used in the model-fitting procedure for Figure 2.

| **Param name** | **Base value** | **Lower bound** | **Upper bound** | **Fixed** |
| --- | --- | --- | --- | --- |
| gIhbar_Ih_basal | 8.00E-05 | 8.00E-05 | 8.00E-05 | Yes |
| gNaTs2_tbar_NaTs2_t_apical | 2.61E-02 | 2.61E-03 | 2.61E-01 | No |
| gSKv3_1bar_SKv3_1_apical | 4.23E-03 | 4.23E-04 | 4.23E-02 | No |
| gIhbar_Ih_apical | 8.00E-05 | 8.00E-06 | 8.00E-04 | No |
| gImbar_Im_apical | 1.43E-04 | 1.43E-05 | 1.43E-03 | No |
| gNaTa_tbar_NaTa_t_axonal | 3.14E+00 | 3.14E-01 | 3.14E+01 | No |
| gK_Tstbar_K_Tst_axonal | 8.93E-02 | 8.93E-03 | 8.93E-01 | No |
| gamma_CaDynamics_E2_axonal | 2.91E-03 | 2.91E-03 | 2.91E-03 | Yes |
| gNap_Et2bar_Nap_Et2_axonal | 6.83E-03 | 6.83E-04 | 6.83E-02 | No |
| gSK_E2bar_SK_E2_axonal | 7.10E-03 | 7.10E-04 | 7.10E-02 | No |
| gCa_HVAbar_Ca_HVA_axonal | 9.90E-04 | 9.90E-05 | 9.90E-03 | No |
| gK_Pstbar_K_Pst_axonal | 9.74E-01 | 9.74E-02 | 9.74E+00 | No |
| gSKv3_1bar_SKv3_1_axonal | 1.02E+00 | 1.02E-01 | 1.02E+01 | No |
| decay_CaDynamics_E2_axonal | 2.87E+02 | 2.87E+02 | 2.87E+02 | Yes |
| gCa_LVAstbar_Ca_LVAst_axonal | 8.75E-03 | 8.75E-04 | 8.75E-02 | No |
| gamma_CaDynamics_E2_somatic | 6.09E-04 | 6.09E-04 | 6.09E-04 | Yes |
| gSKv3_1bar_SKv3_1_somatic | 3.03E-01 | 3.03E-02 | 3.03E+00 | No |
| gSK_E2bar_SK_E2_somatic | 8.41E-03 | 8.41E-04 | 8.41E-02 | No |
| gCa_HVAbar_Ca_HVA_somatic | 9.94E-04 | 9.94E-05 | 9.94E-03 | No |
| gNaTs2_tbar_NaTs2_t_somatic | 9.84E-01 | 9.84E-02 | 9.84E+00 | No |
| gIhbar_Ih_somatic | 8.00E-05 | 8.00E-06 | 8.00E-04 | No |
| decay_CaDynamics_E2_somatic | 2.10E+02 | 2.10E+02 | 2.10E+02 | Yes |
| gCa_LVAstbar_Ca_LVAst_somatic | 3.33E-04 | 3.33E-05 | 3.33E-03 | No |
| g_pas | 3.00E-05 | 3.00E-06 | 3.00E-04 | No |

**Table S3. BBP model.**Parameters used in the model-fitting procedure for Figure 3.

| **Param name** | **Base value** | **Lower bound** | **Upper bound** | **Fixed** |
| --- | --- | --- | --- | --- |
| g_pas_all | 4.46E-06 | 4.46E-08 | 4.46E-05 | No |
| e_pas_all | 9.26E+01 | 6.00E+01 | 1.00E+02 | No |
| gNaTa_tbar_NaTa_t_axonal | 1.27E+00 | 1.27E-02 | 1.00E+01 | No |
| gK_Tstbar_K_Tst_axonal | 7.62E+00 | 7.62E-02 | 1.00E+01 | No |
| gNap_Et2bar_Nap_Et2_axonal | 2.70E-04 | 2.70E-06 | 5.70E-03 | No |
| gK_Pstbar_K_Pst_axonal | 1.85E+00 | 1.85E-02 | 1.00E+01 | No |
| gSKv3_1bar_SKv3_1_axonal | 8.34E-01 | 8.34E-03 | 8.34E+00 | No |
| gCa_LVAstbar_Ca_LVAst_axonal | 3.45E+00 | 3.45E-02 | 1.00E+01 | No |
| gCa_HVAbar_Ca_HVA_axonal | 8.43E-02 | 4.43E-04 | 8.43E-01 | No |
| gSKv3_1bar_SKv3_1_somatic | 3.37E-01 | 3.37E-03 | 3.37E+00 | No |
| gCa_HVAbar_Ca_HVA_somatic | 2.31E-04 | 2.31E-06 | 2.31E-03 | No |
| gNaTs2_tbar_NaTs2_t_somatic | 1.87E+00 | 1.87E-02 | 1.00E+01 | No |
| gCa_LVAstbar_Ca_LVAst_somatic | 6.21E-02 | 6.21E-04 | 6.21E-01 | No |
| gIh_dend | 3.76E-04 | 3.76E-06 | 3.76E-03 | No |
| cm_all | 1.90E+00 | 5.00E-01 | 3.00E+00 | No |
| cm_apical_basal | 5.35E-01 | 5.00E-01 | 3.00E+00 | No |

**Table S4. CoMParE BBP model.**Parameters used in the model-fitting procedure for Figure 4 and 5.

| **Param name** | **Base value** | **Lower bound** | **Upper bound** | **Fixed** |
| --- | --- | --- | --- | --- |
| dend_na12 | 1.77E-02 | 1.77E-03 | 1.77E-01 | No |
| soma_na12 | 4.53E-04 | 4.53E-05 | 4.53E-03 | No |
| ais_na12 | 3.20E-01 | 3.20E-02 | 3.20E+00 | No |
| dend_na16 | 3.67E-07 | 3.67E-08 | 3.67E-06 | No |
| soma_na16 | 5.87E-01 | 5.87E-02 | 5.87E+00 | No |
| ais_na16 | 3.80E-02 | 3.80E-03 | 3.80E-01 | No |
| ais_ca | 6.59E-07 | 6.59E-08 | 6.59E-06 | No |
| ais_KCa | 4.24E-05 | 4.24E-06 | 4.24E-04 | No |
| axon_KP | 1.08E-01 | 1.08E-03 | 1.16E+00 | No |
| axon_KT | 1.20E-02 | 1.20E-04 | 1.13E+00 | No |
| axon_K | 2.69E-01 | 2.69E-03 | 2.76E+00 | No |
| axon_KCa | 1.17E-01 | 1.17E-02 | 1.12E+00 | No |
| axon_HVA | 2.58E-08 | 2.58E-09 | 2.58E-07 | No |
| axon_LVA | 1.49E-06 | 1.26E-07 | 1.26E-04 | No |
| node_na | 5.38E+00 | 2.00E-02 | 1.00E+01 | No |
| soma_K | 2.18E-01 | 2.22E-04 | 2.22E+00 | No |
| dend_K | 2.37E-02 | 2.37E-03 | 4.23E-01 | No |
| gpas_soma | 6.81E-07 | 9.20E-10 | 3.00E-06 | No |
| gpas_apical | 3.41E-08 | 9.20E-10 | 3.00E-06 | No |
| gpas_basal | 1.24E-08 | 9.20E-10 | 3.00E-06 | No |
| gpas_axon | 2.15E-04 | 2.15E-07 | 2.15E-03 | No |
| cm_all | 1.93E+00 | 5.00E-01 | 3.00E+00 | No |
| cm_axon | 1.70E+00 | 5.00E-01 | 3.00E+00 | No |
| e_pas_all | 8.42E+01 | 6.00E+01 | 1.10E+02 | No |
| e_pas_axon | 8.01E+01 | 6.00E+01 | 1.10E+02 | No |
| ih_dend | 3.76E-04 | 3.76E-06 | 3.76E-03 | No |

**Table S5. CoMParE L5 AIS model.**Parameters used in the model-fitting procedure for Figure 5.

**
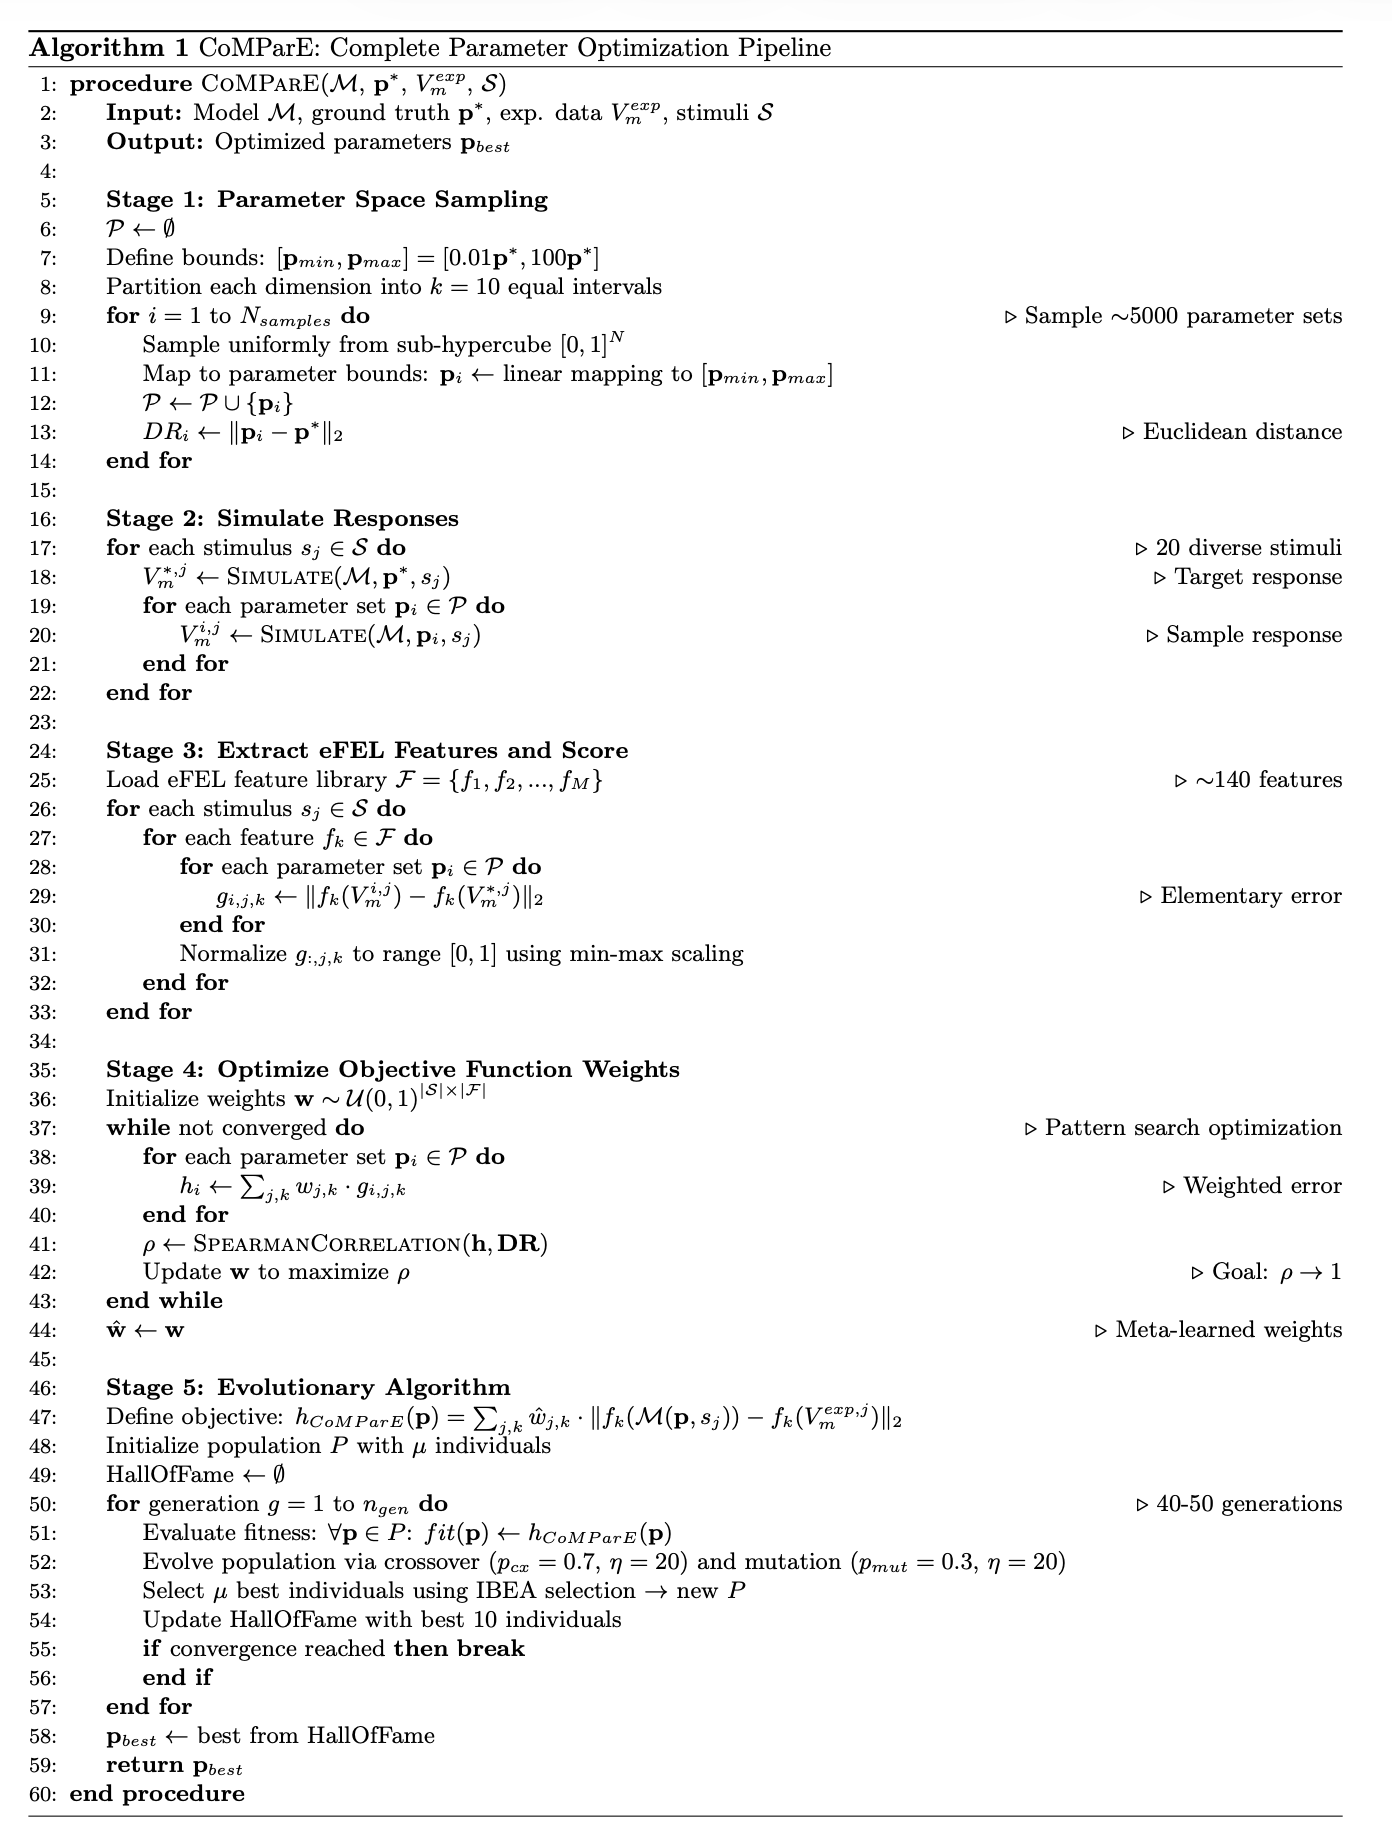

Supplementary Pseudocode.**
